# Supplementary material for: 1H–31P CP/MAS NMR studies of mesostructured aluminophosphates
Source: Royal Society of Chemistry journal article supplement (doi:10.1039/b102105m), 2001-01-01
Supplement: captions.doc [file captions.doc]

**Figure captions**

**Figure S1.** Deconvoluted 31P MAS NMR spectrum of Hex‑1.

**Figure S2.** Deconvoluted 31P MAS NMR spectrum of Hex‑2.

**Figure S3.** Deconvoluted 31P MAS NMR spectrum of L1a.

**Figure S4.** Deconvoluted 31P MAS NMR spectrum of L1b.

**Figure S5.** Deconvoluted 31P MAS NMR spectrum of L2.

**Figure S6.** Deconvoluted 31P MAS NMR spectrum of L3.
